# Supplementary material for: Assessment of type I interferon signatures in undifferentiated inflammatory diseases: A Japanese multicenter experience
Source: PubMed Central journal article supplement (PMC9541620; doi:10.3389/fimmu.2022.905960), 2022-09-23
Supplement: DataSheet_1.pdf [file DataSheet_1.pdf]

## *Supplementary Material*

### **1 Supplementary Data**

#### *Nuclear factor- $\kappa$ B (NF- $\kappa$ B) reporter gene activity assay*

NF- $\kappa$ B reporter gene activity was measured as previously reported[30]. HEK293T cells, in 96-well plates, were transfected with 10 ng per well of the following vectors: a pcDNA3.1+ mock vector, pcDNA3.1+ containing WT myc-A20, or pcDNA3.1+ containing myc-A20 variants. DNA transfection was carried out using Lipofectamine 2000 (Invitrogen, Carlsbad, CA) according to the manufacturer's instructions. The NF- $\kappa$ B luciferase reporter construct and a *Renilla* luciferase control were co-transfected into the cells. After transfection, cells were incubated for 24 hours, and then stimulated with 20 ng/mL tumor necrosis factor  $\alpha$  (TNF- $\alpha$ ) (R&D Systems, Inc., Minneapolis, MN) for 6 hours. Luciferase reporter activity was analyzed using the Dual-Luciferase Reporter Assay System (Promega, Madison, WI). The activity values for WT and each variant were normalized to that of the mock vector transfection, stimulated with 20 ng/mL TNF- $\alpha$ .

## 2 Supplementary Figures and Tables

Table S1: Details of the numbers of patients and samples from each disease group.

|                              | Number of patients | Number of samples | Details                                                                                                                                               |
|------------------------------|--------------------|-------------------|-------------------------------------------------------------------------------------------------------------------------------------------------------|
| Healthy controls             | 11                 | 11                |                                                                                                                                                       |
| Pediatric controls           | 12                 | 12                |                                                                                                                                                       |
| AGS1                         | 2                  | 2                 |                                                                                                                                                       |
| AGS5                         | 1                  | 1                 |                                                                                                                                                       |
| AGS7                         | 2                  | 2                 |                                                                                                                                                       |
| SAVI                         | 3                  | 3                 |                                                                                                                                                       |
| COPA                         | 2                  | 2                 |                                                                                                                                                       |
| PRAAS                        | 4                  | 5                 | 1 patient was evaluated twice.                                                                                                                        |
| SPENCDI                      | 2                  | 2                 |                                                                                                                                                       |
| SLE                          | 2                  | 2                 |                                                                                                                                                       |
| DLE                          | 1                  | 1                 |                                                                                                                                                       |
| DM                           | 7                  | 7                 |                                                                                                                                                       |
| CGD                          | 2                  | 3                 | 1 patient was evaluated twice.                                                                                                                        |
| Early-onset Behcet's disease | 1                  | 1                 |                                                                                                                                                       |
| HA20                         | 9                  | 9                 |                                                                                                                                                       |
| IPH                          | 3                  | 5                 | 2 patients were evaluated twice.                                                                                                                      |
| CAEBV                        | 1                  | 1                 |                                                                                                                                                       |
| HMB                          | 1                  | 3                 | 1 patient was evaluated three times.                                                                                                                  |
| Kawasaki disease             | 1                  | 1                 |                                                                                                                                                       |
| Takayasu arthritis           | 2                  | 2                 |                                                                                                                                                       |
| CAPS                         | 2                  | 2                 |                                                                                                                                                       |
| FMF                          | 2                  | 4                 | 2 patients were evaluated twice.                                                                                                                      |
| PAAND                        | 1                  | 1                 |                                                                                                                                                       |
| PFAPA                        | 6                  | 6                 |                                                                                                                                                       |
| Undiagnosed                  | 37                 | 52                | Patients with a low IS were evaluated once.<br>Some patients with a high IS were evaluated multiple times, details of which are described in Table 2. |
| Total                        | 117                | 140               |                                                                                                                                                       |

Table S2: Genotypes and clinical phenotypes of patients with A 20 haploinsufficiency.

| Patient        | Gender | Age at IS analysis | Disease-onset age | IS   | genotype                                | Initial diagnosis before genetic analysis                | CRP at IS analysis (mg/L) | Symptoms at IS analysis              | Treatment at IS analysis               |
|----------------|--------|--------------------|-------------------|------|-----------------------------------------|----------------------------------------------------------|---------------------------|--------------------------------------|----------------------------------------|
| 1              | F      | 37y                | Infancy           | 40.3 | c.986+1 G>T,<br>p.Lys329Asn*1 hetero    | SLE (Recurrent fever, lymphadenitis, arthritis)          | N/D                       | None                                 | PSL,<br>Hydroxychloroquine             |
| 2              | M      | 15y                | 4y                | 41.0 | c.133C>T,<br>p.Arg45* hetero            | Crohn's disease                                          | N/D                       | None                                 | Colchicine,<br>Mesalamin               |
| 3              | F      | 6y                 | 7m                | 51.7 | c.1747G>T,<br>p.Gly583* hetero          | Recurrent fever with arthralgia and abdominal pain       | 7                         | None                                 | No treatment                           |
| 4              | M      | 10y                | 1y1m              | 48.2 | c.133C>T,<br>p.Arg45* hetero            | PFAPA-like recurrent fever → intestinal Behçet's disease | 5                         | Stomatitis                           | Colchicine                             |
| 5 <sup>a</sup> | F      | 5y                 | 6m                | 46.2 | c.2209delC,<br>p.Gln737Serfs*79 hetero  | FMF like autoinflammatory disease                        | <0.2                      | None                                 | Etanercept                             |
| 6 <sup>a</sup> | F      | 29y                | 5y                | 56.0 | c.2209delC,<br>p.Gln737Serfs*79 hetero  | Crohn's disease, Hashimoto's disease                     | 7.1                       | None                                 | No treatment                           |
| 7 <sup>a</sup> | F      | 68y                | Early childhood   | 44.3 | c.2209delC,<br>p.Gln737Serfs*79 hetero  | Recurrent stomatitis, Hashimoto's disease                | N/D                       | None                                 | No treatment                           |
| 8              | F      | 19y                | 11y               | 27.1 | c.252delC,<br>p.Trp85Glyfs*11 hetero    | RF negative pJIA → intestinal BD                         | 0.8                       | None                                 | ADA, PSL,<br>Celecoxib, Igaratimod     |
| 9              | M      | 4y                 | 1y                | 24.7 | c.2088+5G>C,<br>p.His636Glufs*55 hetero | sJIA → Psoriatic arthritis                               | 11.3                      | Skin erythema, adrenal insufficiency | IFX, MTX, PSL,<br>Naproxen, Colchicine |

a: Patients 6 and 7 are the mother and grandmother of patient 5, respectively.

M: male, F: female, PSL: prednisolone, ADA: adalimumab, IFX: infliximab, MTX: methotrexate

Table S3: Clinical phenotypes of patients with idiopathic pulmonary hemorrhage.

| Patient | Gender | Age at IS analysis | Disease-onset age | IS        | Clinical manifestation at diagnosis |       |         |            | Extrapulmonary manifestations                   | Symptoms at IS analysis | Auto-antibodies                              | Hemosiderin-laden macrophages | Treatment                   | Genotype                                                       |
|---------|--------|--------------------|-------------------|-----------|-------------------------------------|-------|---------|------------|-------------------------------------------------|-------------------------|----------------------------------------------|-------------------------------|-----------------------------|----------------------------------------------------------------|
|         |        |                    |                   |           | Anemia                              | Cough | Dyspnea | Hemoptysis |                                                 |                         |                                              |                               |                             |                                                                |
| 1       | F      | 15y                | 4y                | 93.7/48.6 | +                                   | +     | +       | +          | None                                            | None                    | ANA 1:320, Anti-ssDNA, Anti-dsDNA, Anti-SS-A | +(gastric aspirate)           | PSL, AZA, ICS, CAM          | No pathogenic mutations found in the NGS-based gene panel test |
| 2       | F      | 13y                | 4y                | 11.2/13.5 | +                                   | +     | -       | +          | None                                            | None                    | ANA 1:80                                     | +(sputum)                     | PSL, ICS, CAM               | Not analyzed                                                   |
| 3       | F      | 20y                | 2w                | 1.62      | +                                   | +     | +       | +          | Arthralgia, morning stiffness, annular erythema | None                    | ACPA, RF                                     | N/D                           | Iguratimod (for arthralgia) | No mutations in the <i>COPA</i> gene                           |

ACPA: anti-cyclic citrullinated peptide antibody, AZA: azathioprine, ICS: inhaled corticosteroid, CAM: clarithromycin, NGS: next-generation sequencing

Table S4: Clinical phenotypes of patients with chronic active Epstein-Barr virus disease (CAEBV) and hypersensitivity to mosquito bites (HMB).

| Patient | Gender | Age at IS analysis | Disease-onset age | IS   | diagnosis | Clinical manifestation at sampling |           |                 |                    | EBV DNA load in whole blood (copy/ $\mu$ gDNA) | Infected cell type | Treatment |
|---------|--------|--------------------|-------------------|------|-----------|------------------------------------|-----------|-----------------|--------------------|------------------------------------------------|--------------------|-----------|
|         |        |                    |                   |      |           | fever                              | Skin rash | lymphadenopathy | hepatosplenomegaly |                                                |                    |           |
| 1       | F      | 1y4m               | 1y1m              | 12.2 | CAEBV     | +                                  | +         | +               | +                  | 2400                                           | T cell             | PSL       |
| 2-1     |        | 3y4m               |                   | 3.3  |           | -                                  | +         | -               | -                  | 32000                                          |                    | None      |
| 2-2     | F      | 3y10m              | 2y4m              | 13.6 | HMB       | -                                  | ++        | -               | -                  | 52000                                          | NK cell            | None      |
| 2-3     |        | 5y2m               |                   | 26.0 |           | -                                  | ++        | -               | -                  | 15000                                          |                    | None      |

Table S5 : A summary of histological and immunohistochemical findings for the 10 samples studied.

| Patient                                       | 1                                           | 2                                           | 3-1              | 3-2              | 4                                           | 5                | 6                                           | 7                                | 8                                   | 9                | 10                                          |
|-----------------------------------------------|---------------------------------------------|---------------------------------------------|------------------|------------------|---------------------------------------------|------------------|---------------------------------------------|----------------------------------|-------------------------------------|------------------|---------------------------------------------|
| <b>CD163</b>                                  | ++                                          | ++                                          | N/D              | +++              | +++                                         | +++              | +++                                         | ++                               | ++                                  | ++               | +++                                         |
| <b>MPO</b>                                    | +++                                         | ++                                          | ++               | +++              | +                                           | ++               | ++                                          | +                                | -                                   | +                | ++                                          |
| <b>CD15</b>                                   | +                                           | -                                           | N/D              | +++              | +                                           | +                | -                                           | +                                | -                                   | +                | +                                           |
| <b>CD123</b>                                  | +                                           | -                                           | N/D              | -                | -                                           | -                | ++                                          | -                                | -                                   | ++               | +                                           |
| <b>CD3</b>                                    | +                                           | ++                                          | N/D              | ++               | +                                           | ++               | ++                                          | +                                | ++                                  | +++              | ++                                          |
| <b>CD20</b>                                   | -                                           | +                                           | N/D              | +                | +                                           | +                | +                                           | -                                | -                                   | +                | +                                           |
| <b>Derma<br/>l<br/>infiltrate<br/>pattern</b> | Perivas<br>cular<br>and<br>intersti<br>tial | Perivas<br>cular<br>and<br>intersti<br>tial | Perivas<br>cular | Perivas<br>cular | Perivas<br>cular<br>and<br>intersti<br>tial | Perivas<br>cular | Perivas<br>cular<br>and<br>intersti<br>tial | Perivas<br>cular                 | Superfi<br>cial<br>perivas<br>cular | Perivas<br>cular | Perivas<br>cular<br>and<br>intersti<br>tial |
| <b>Epider<br/>mal<br/>change</b>              | -                                           | -                                           | -                | -                | -                                           | -                | -                                           | Vacuol<br>ar<br>degener<br>ation | Vacuol<br>ar<br>degener<br>ation    | -                | -                                           |
| <b>Vasculi<br/>tis</b>                        | -                                           | -                                           | -                | +                | -                                           | -                | -                                           | -                                | -                                   | -                | -                                           |
| <b>Pannic<br/>ulitis</b>                      | -                                           | -                                           | N/D              | Septal           | -                                           | -                | -                                           | Lobular                          | -                                   | -                | -                                           |

N/D: no data

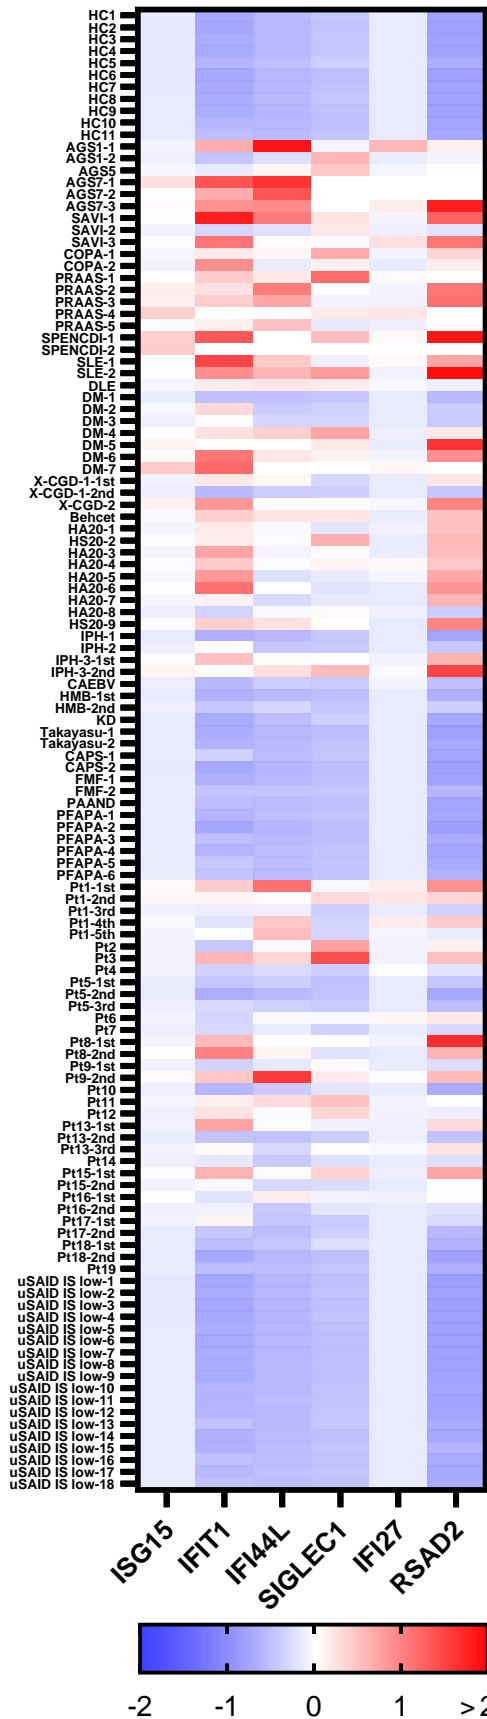

Figure S1- A heatmap of z-scored relative expression of 6 interferon stimulated genes. Columns show z-scored relative expression of each interferon stimulated gene. Rows show a diagnosis of each patient. Results of re-examination are expressed by ordinal numbers.

Z-scored relative gene expression

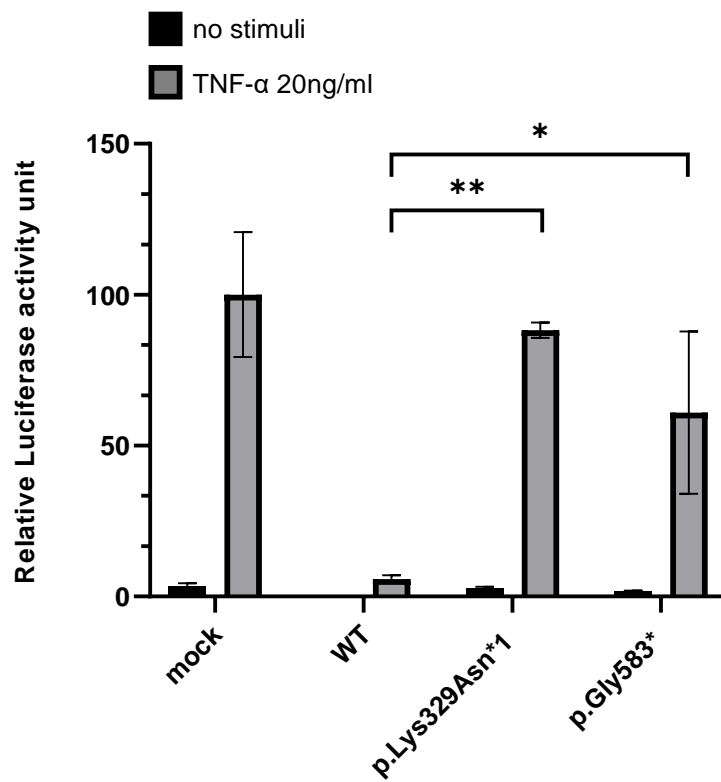

Figure S2- Results of the *NF-κB* reporter gene activity assay. All experiments were performed in triplicate. Values are expressed as the mean ± standard deviation (SD). Statistical significance of the difference between the WT and variants stimulated with TNF-α was measured by luciferase activity and analyzed using a one-way ANOVA with Dunnett's multiple comparisons test. Calculated p values are indicated; p < 0.05 with \* and p < 0.001 with \*\*. Suppression of the TNF-α induced *NF-κB* activity by the *TNFAIP3* variants was significantly lower than that seen in the WT.

P1

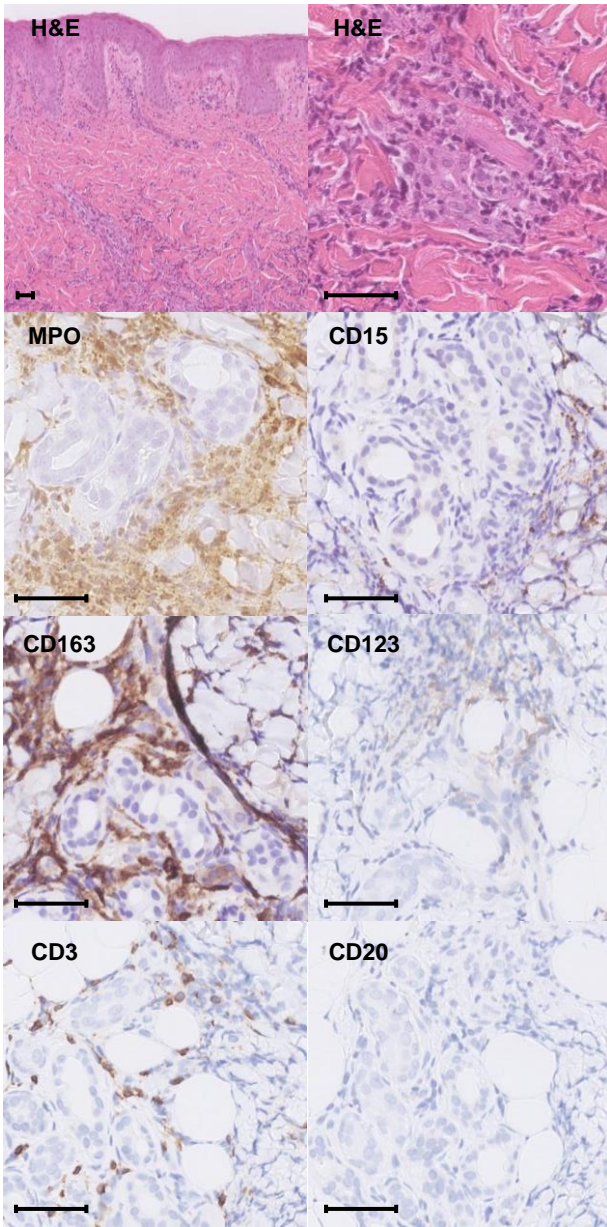

P2

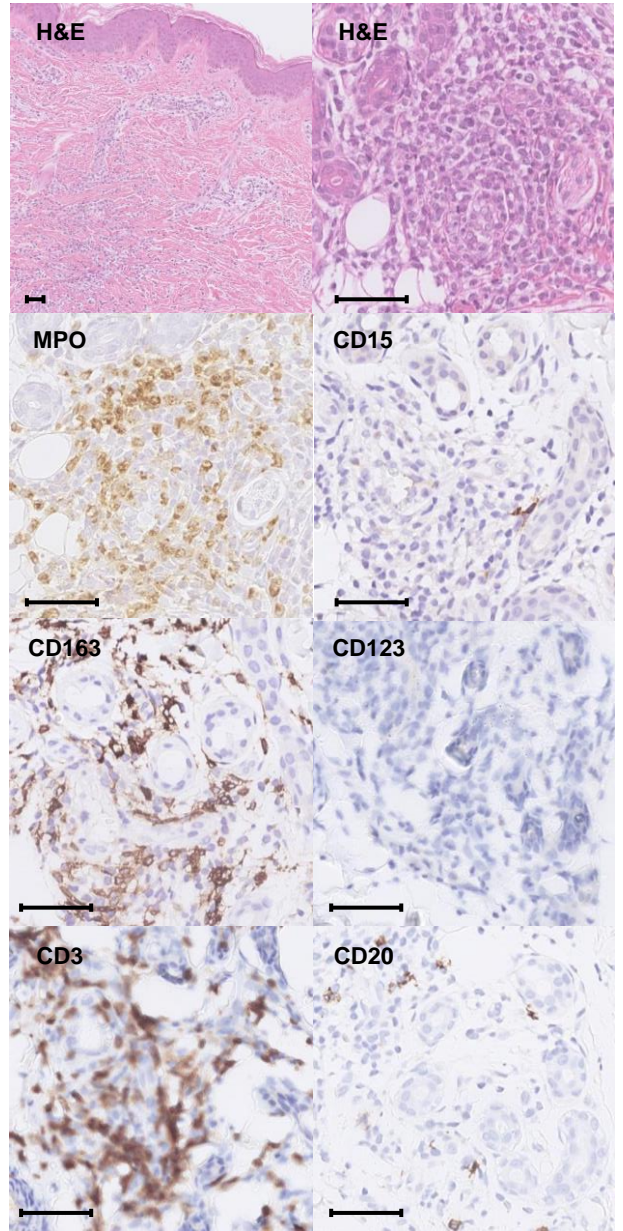



P3-1

P3-2

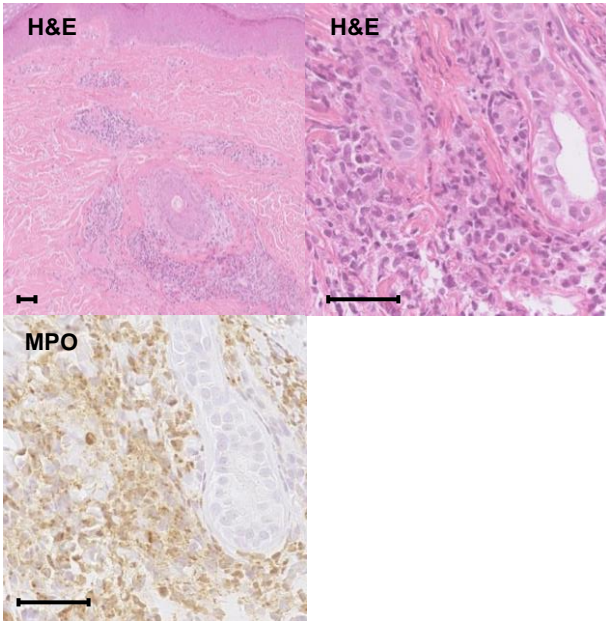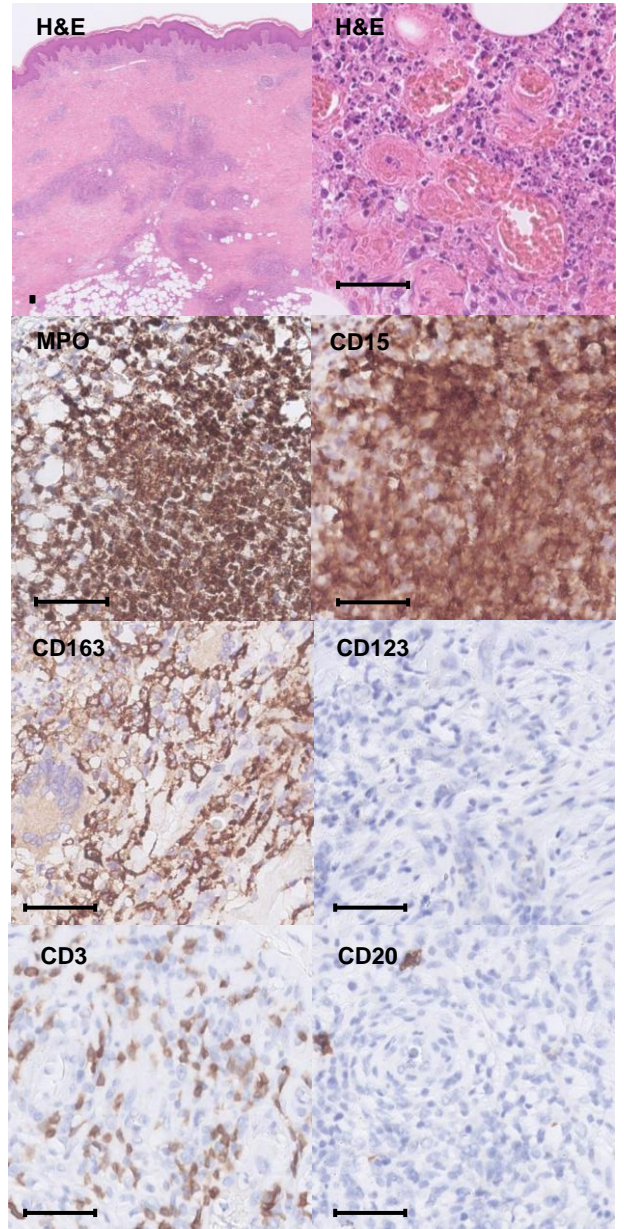



P4

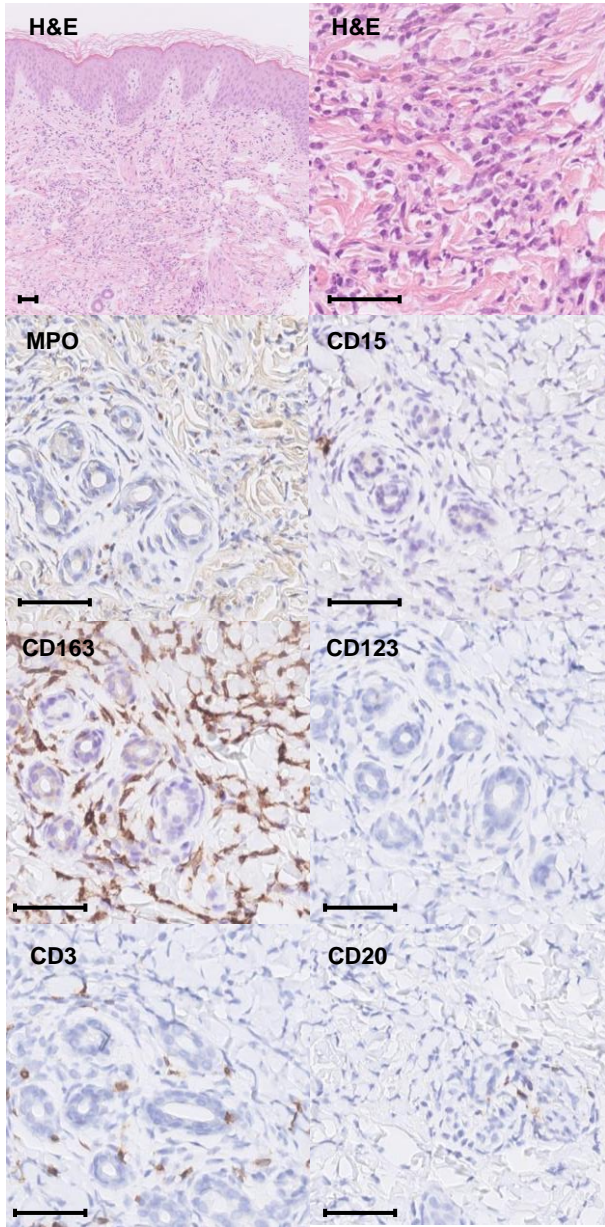

P5

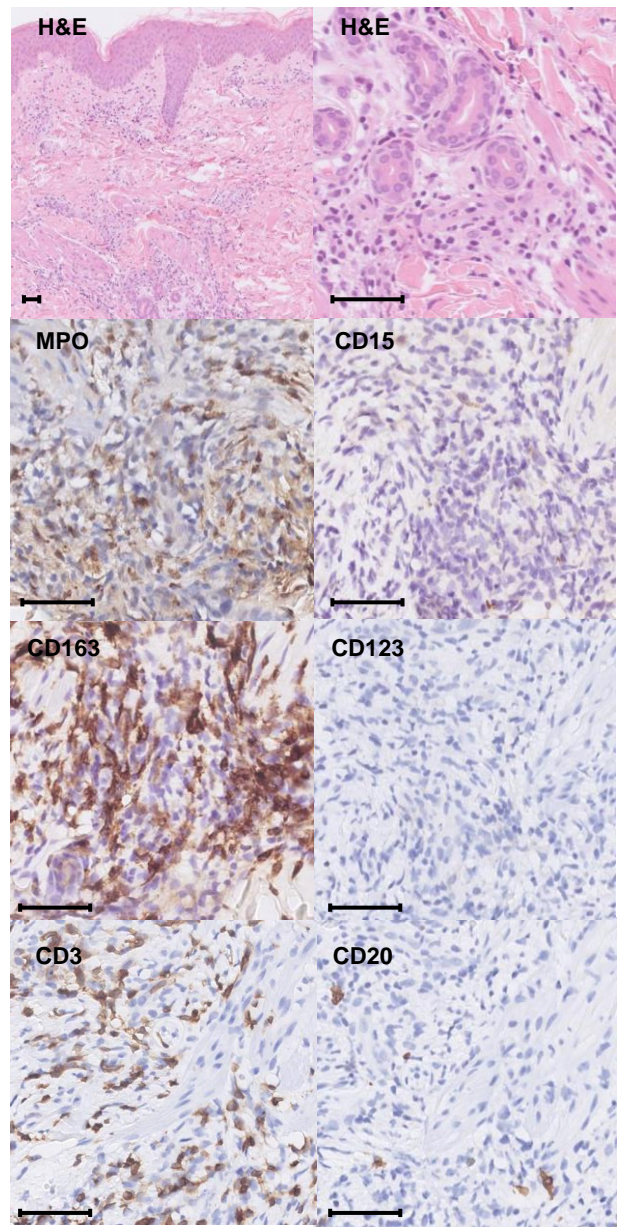



P6

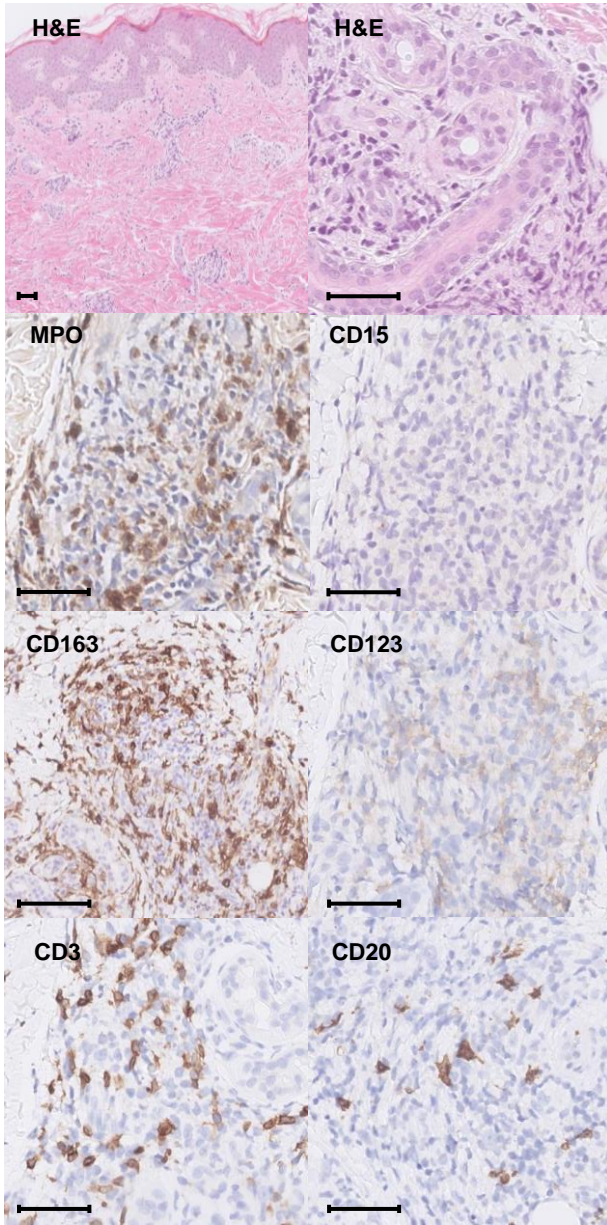

P7

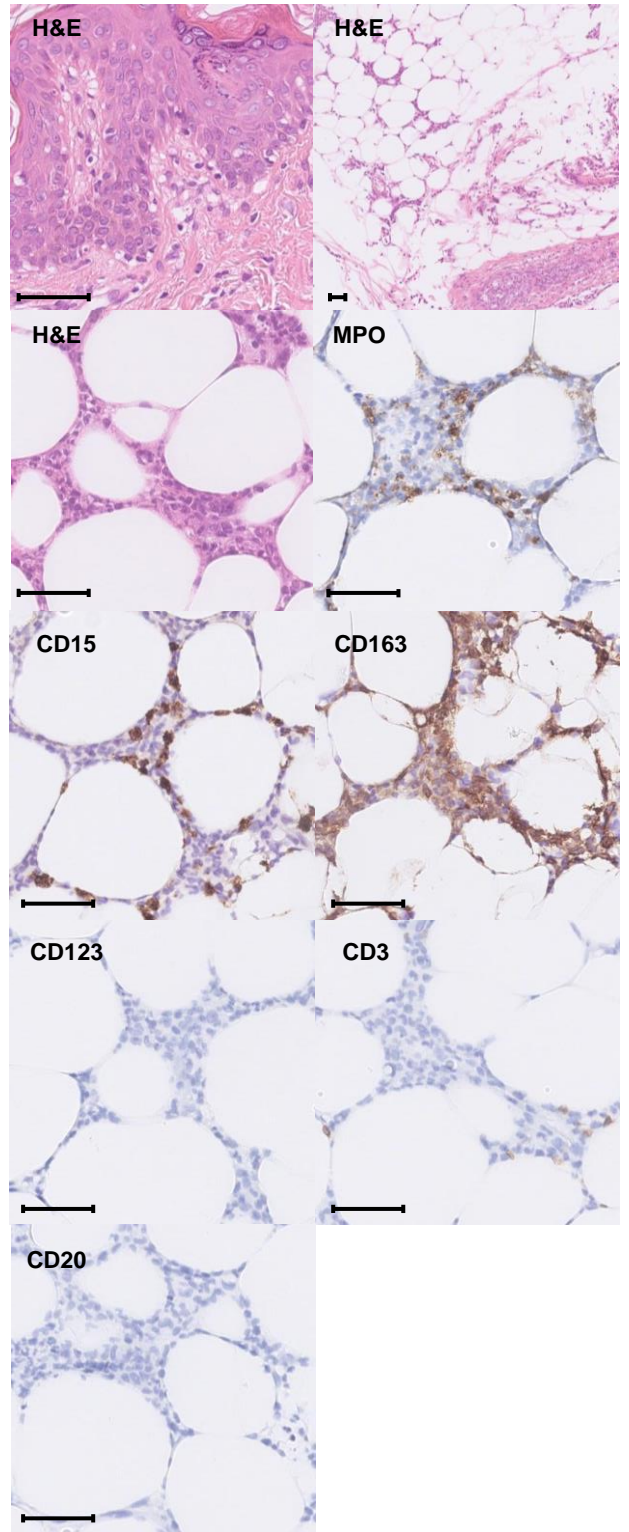



P8

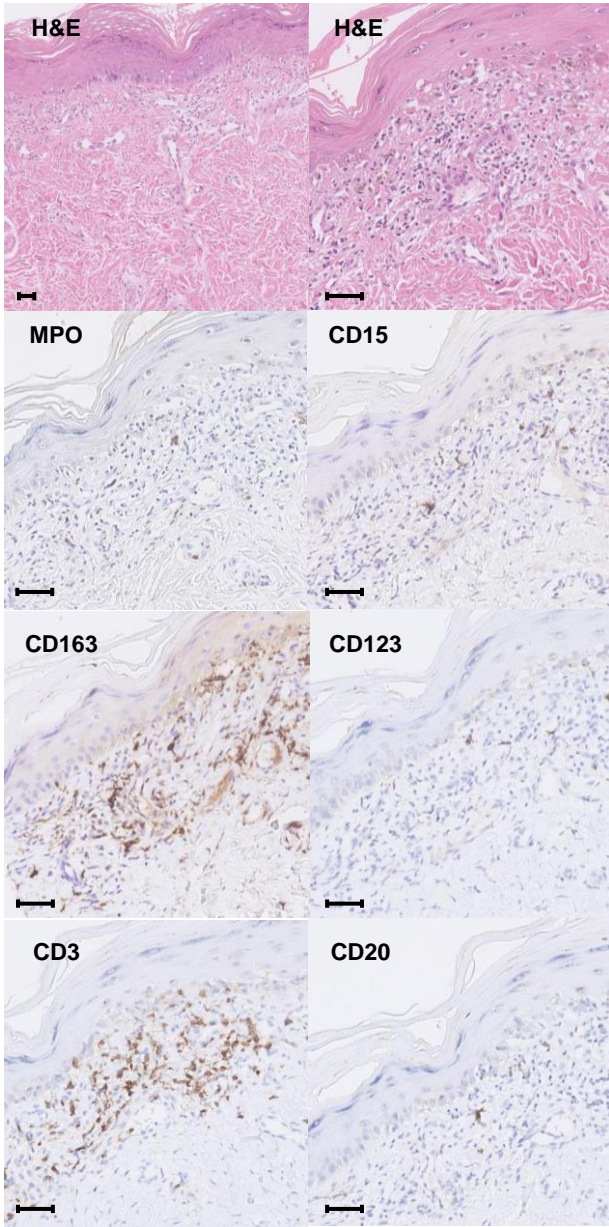

P9

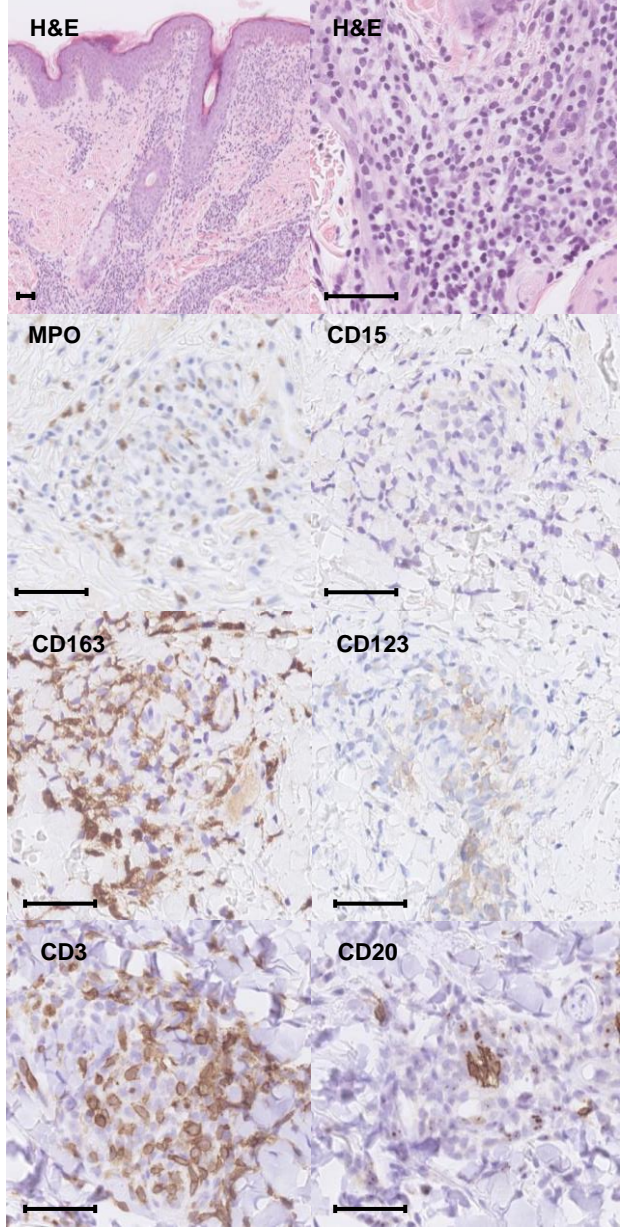

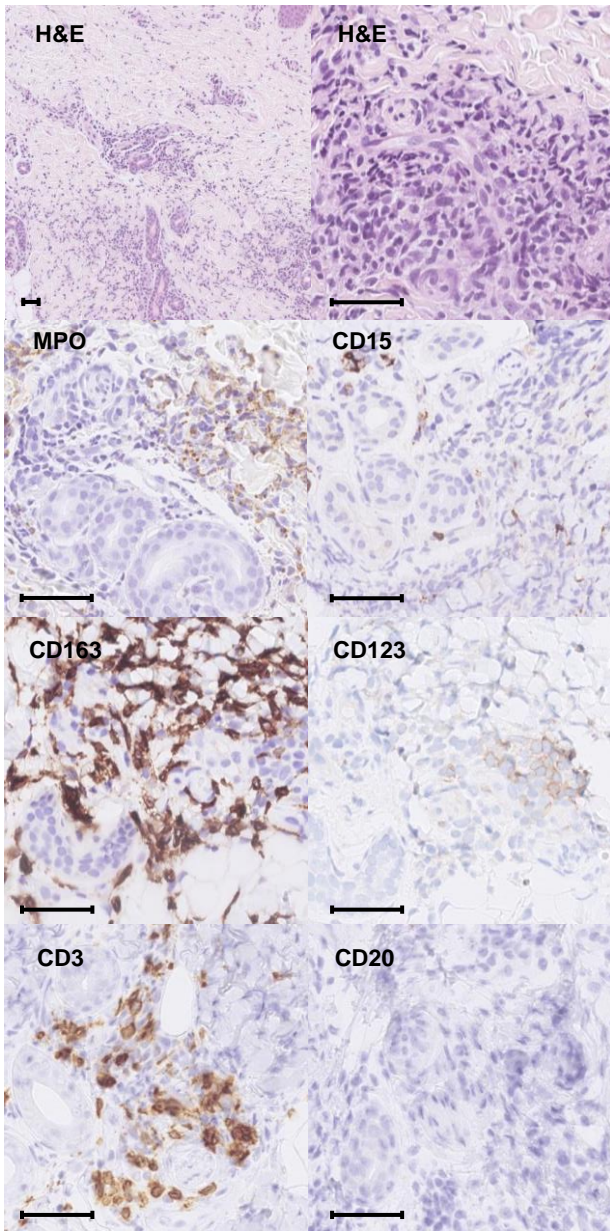

Figure S3- *H&E stained sections of patients.* With the exception of the sections for patients P3-2, P7, and P8, all sections showed superficial and deep perivascular dermal infiltrates without epidermal changes, containing mononuclear cells, many of which were MPO-positive and CD15-negative. The skin specimen for P3-2 showed leukocytoclastic vasculitis and septal panniculitis, in addition to dermal infiltrates consisting of matured neutrophils, histiocytes, and lymphocytes. The H&E stained section for patient 7 showed lobular panniculitis, and superficial and deep perivascular dermatitis with vacuolar changes. Cellular infiltrates mainly consisted of MPO-positive and CD163-positive mononuclear cells. The H&E stained section for patient 8 showed superficial perivascular dermatitis with vacuolar degeneration of the basal layer, and exhibited CD3-positive T cell, but not CD20-positive B cell infiltration. The scale bar for all sections represents 50 μm.
